# Supplementary material for: Structures of Three Actinobacteriophage Capsids: Roles of Symmetry and Accessory Proteins
Source: PubMed Central journal article supplement (PMC7150772; doi:10.3390/v12030294), 2020-03-08
Supplement: viruses-12-00294-s001.pdf [file viruses-12-00294-s001.pdf]

## Supporting information

218 249

d1y02a1  
 2OUT\_R  
 2OUT\_R  
 ECOD\_000003132  
 d1zrja1  
 ECOD\_000003132  
 d4uzwa1  
 d1kcfa1  
 d2outa1  
 d2do1a1

| Hit                    | Name                                                                                     | Probability | E-value | SS  | Cols |
|------------------------|------------------------------------------------------------------------------------------|-------------|---------|-----|------|
| d1y02a1                | Rififylin (FYVE-RING finger protein Sakura) {Homo sapiens}                               | 92.56       | 0.36    | 4   | 32   |
| 2OUT_A                 | Mu-like prophage FluMu protein gp35 {Haemophilus influenzae}                             | 89.61       | 1.1     | 4   | 37   |
| ECOD_000003132_e1y02A1 | Domain A:alpha arrays, X:"LEM/SAP HeH motif", F: KOG4275                                 | 86.75       | 3.3     | 4   | 32   |
| d1zrja1                | Heterogenous nuclear ribonucleoprotein U-like protein 1 {Homo sapiens}                   | 84.59       | 4.3     | 3.3 | 32   |
| ECOD_000003126_e2outA1 | Domain A:alpha arrays, X:"LEM/SAP HeH motif-like", T:"LEM/SAP HeH motif", F:HeH          | 81.93       | 6.9     | 3.6 | 29   |
| d4uzwa1                | Automated matches (A:2-50) {Saccharomyces cerevisiae}                                    | 81.16       | 7       | 3.3 | 32   |
| d1kcfa1                | Mitochondrial resolvase ydc2 N-terminal domain {Schizosaccharomyces pombe}               | 80.19       | 10      | 3.8 | 30   |
| d2outa1                | Uncharacterized protein HI1507 in Mu-like prophage FluMu region {Haemophilus influenzae} | 78.35       | 11      | 3.6 | 29   |
| d2do1a1                | Nuclear protein hcc-1 {Homo sapiens}                                                     | 77.62       | 13      | 3.4 | 31   |

**Supporting Figure S1. HHPRED prediction of Rosebush gp17.** The amino acid sequence of gp17 was used as the input into HHPRED and searched against all the available databases.

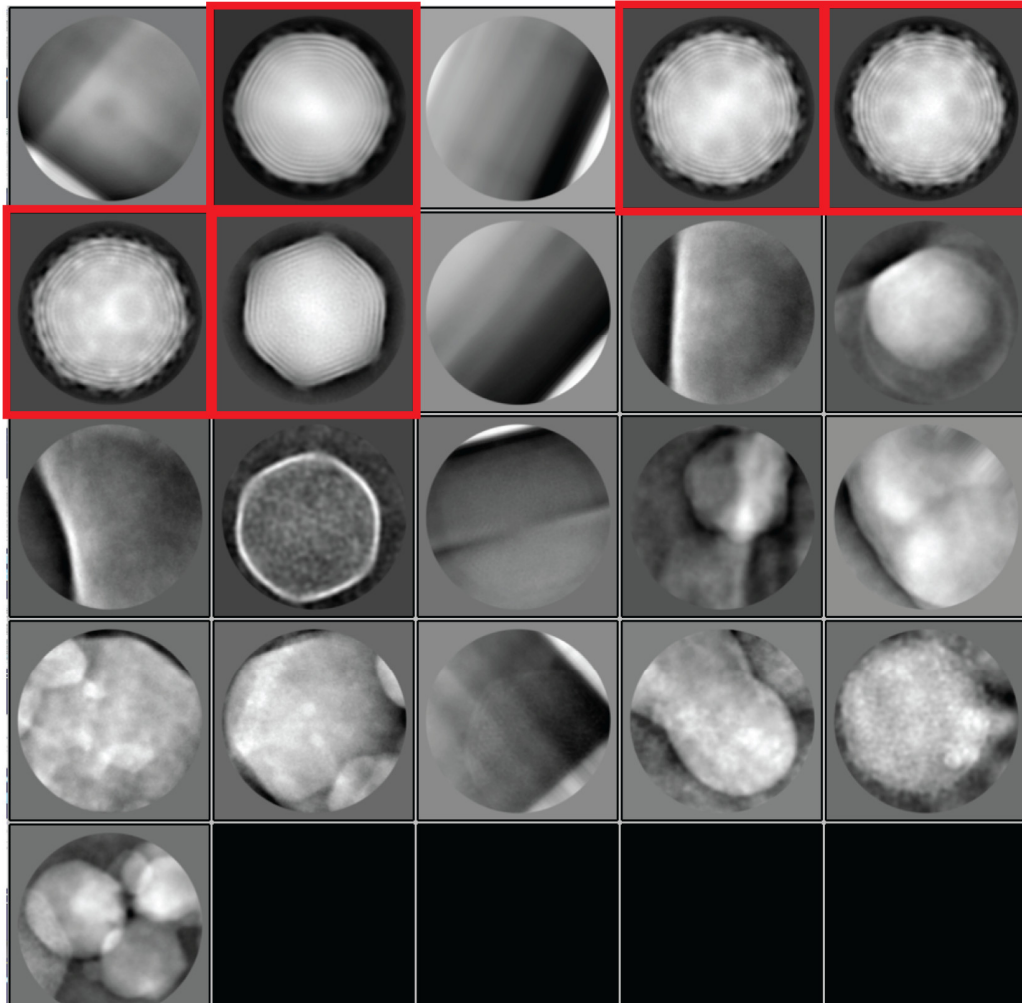

**Supporting Figure S2. 2D classes selected from multiplexed Rosebush and Patience cryo-EM grid.** The red boxes highlight the “good” classes chosen for 3D classification and refinement.

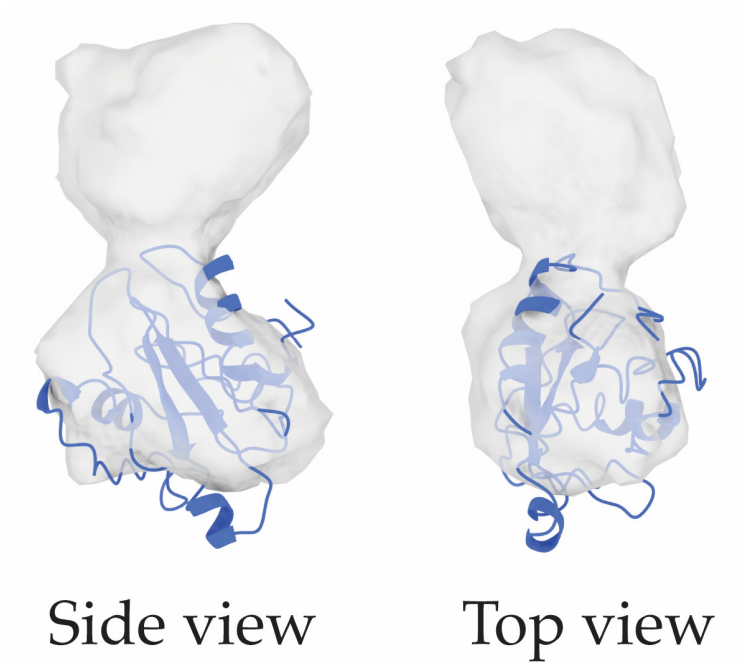

**Supporting Figure S3. I-TASSER predicted model of Patience gp29 fitted into decoration protein density using ChimeraX.**

|              |                                                                                       |     |
|--------------|---------------------------------------------------------------------------------------|-----|
| Pupper       | -MLRVPVDNPTLRRTLRLPLYAQHQATPWGGFLDPTYDPATDPEIYPGTVMKRADLGTARD                         | 59  |
| E3           | -MFKTPIQNAATQKRTIRPQYAQHQAATAWAGWLDPAWDRK--FDVLPGMVMCRKG-----                         | 51  |
| Myrna        | -MFRPPLANPAQKRTLRLPLYANHQATPWGGFLDPLDLDVD--FDIYPGTVMQRV-----                          | 50  |
| Alice        | MTFRPPASNPGQKRTLVPRYANTQATPWAGFLDPLDLDVD--FDILPGTVMQRL-----                           | 51  |
| Phrappuccino | -MFRVTPANPAQKRTIRPVYAQHQAATAYAGFLDPAWDRS--FDIVPGTVMSRK-----                           | 50  |
| Stormageddon | -MFMVPSNPAIKRTIRPLYAQHQAATWAGFLDPNWDRS--FDILPGCVMTRL-----                             | 50  |
| Finch        | -MFRVPLANPSLKRLLRPLFAQHQAATPKPGLDPTWDRS--FDIYPGSVMTRL-----                            | 50  |
|              | : * : * : * : * : * : * : * : * : * : * : * : * : * : * : * : * : * : * : * : *       |     |
| Pupper       | GGEVWKPYDGT---GEFVGLSALFMAP----SMGVNEVTASGTLNFTIIVGGSDAVFEIL                          | 112 |
| E3           | PGEVFAPFESVAASGKGFGLAALFLAP---KMQIDEVTPTGTNAFTVWVGNNNAAFEIL                           | 107 |
| Myrna        | YGEVFAPYTGEA-GTSPVGLSALFVNTGGYQGHQVNEVTGSGTGLFTIWIIGPDAMFEIL                          | 109 |
| Alice        | YGDVFAPYTGEA-GTVFFGLSALFHAP----RLGVTEVSSAGTGLFTVWVGSDQAVFDVL                          | 106 |
| Phrappuccino | SGEVFEPFTGKP-GQKPFGLSALFAAP----RLGIDEVTGTGANNFTVWVGGEQAVFEIL                          | 105 |
| Stormageddon | SKEVFAPYTGQA-NAKPFGLSAFFMAP----RLGVEEVTGTGQNLFTVWVGNDDAEFEIL                          | 105 |
| Finch        | FGDVYAPYTGAA-GQKPFGLSAFFVAP----KLGVEVLDTGSLNFTVWVGNNDAEFEVL                           | 105 |
|              | : * : * : . . . * : * : * : * : * : * : * : * : * : * : * : * : * : * : * : * : * : * |     |
| Pupper       | SPAFDPTGLNTAE-----AGAYLTGNSDGLLTVT---GATNANSIAQLVEVSDAKIIV                            | 163 |
| E3           | APAFDQATATWTEPGPGRVLLFPSSLVAGQIGKLTPTKAGMDDTDAVAELLDVIDANTILV                         | 167 |
| Myrna        | APAFDTEADWPEV--TGPG-KYMLTANAQQLTPE---GVNPGNAIATLIDIPSTDKII                            | 163 |
| Alice        | APAFDVEADWPAAGETGPA-RVMLTANSKGRLLTPD---GVTPENVIAELIDIPSTDKITI                         | 162 |
| Phrappuccino | NPGFDDLADWNAANVTDGS-FKLLTATDTGLLTPT---GVDHGNAVAELIDVISTDAIQI                          | 161 |
| Stormageddon | APAFDTTADWTLF--TNGS-IKLLTGNSQAKLTPA---GATVYNAIAELIDVVGTDKIVI                          | 159 |
| Finch        | APAFDATADWTFP--TNGS-IVLLTGNNKGLLTPD---GATAANAIAELLSVNGTEKITI                          | 159 |
|              | * . * * . . . * . . . * * * * : : * * : : . . * : *                                   |     |
| Pupper       | RLHRKVTA-----                                                                         | 171 |
| E3           | SLNRQK-----                                                                           | 173 |
| Myrna        | SLDRYDIAASGGGLAGGS                                                                    | 181 |
| Alice        | RLNRLDLAATGGGLAGGS                                                                    | 180 |
| Phrappuccino | RLNRYDLT-SAVALAGGS                                                                    | 178 |
| Stormageddon | RPFRTPG-TGA-----                                                                      | 170 |
| Finch        | RPVVRPTA-----                                                                         | 166 |
|              | *                                                                                     |     |

**Supporting Figure S4. Multiple sequence alignment of bacteriophage proteins that are related (in the same pham) to Myrna minor coat protein 98.** Alignment was done using Clustal Omega. Information of each bacteriophage aligned is as follows. **Pupper:** DO subcluster, gene 95, accession number MK977695. **E3:** Singleton, gene 81, no accession number. **Myrna:** C2 subcluster, gene 98, accession number EU826466. **Alice:** C1 subcluster, gene 91, accession number JF704092. **Phrappuccino:** AA subcluster, gene 54, accession number MK937592. **Stormageddon:** DX subcluster, gene 14, accession number MN586040. **Finch:** Singleton, gene 18, accession number MG962366.

|                |                                                                |     |
|----------------|----------------------------------------------------------------|-----|
| Rosebush       | MPAGIAVE-LDNGFATLEFLDKAARGRALEALIRVGGPATIEKLTREKARSVRYRVPEG    | 59  |
| Arbiter        | MPAGIAVE-LDNGFATLEFLDKAARGRALEALIRVGGPATIEKLTREKARSVRYRVPEG    | 59  |
| Hosp           | MPAGI IAT-IDGDYATIDFVNQALRGPALAEALGAP--IETITRD--GPRRKYRVLVN    | 55  |
| Thonko         | MPEGI IAT-VEGGFATVDI IDPQTRHEKLAELIEIGGPGSVETITRV--GPRRQYRVVPG | 57  |
| Phelemich      | MPAGI IAT-VDDGYATVDFVDPTRLRGPGLQAVIDIAGPHAIETITRK--GPRRQYKMLVG | 57  |
| LilMcDreamy    | MPEGIVAT-VEDGYATLDFVDVTKRGPALQALIELAGPDSIETITRR--GPRRQYRVLVD   | 57  |
| Athena         | MPAGIEVV-VEDGFATIDFLDPKLGKLPALGRILASGGPGVVEPLTREKGS PRKRYRVPEG | 59  |
| TPA2           | MPAGIEVE-VDNGFATLDFVNKSLRGPALAKLIEQGGGEIETITRE--GPRRKYRVPLG    | 57  |
| BirdsNest      | MPEGI IATDHGDGFVTLDFVDKSLRGPALDELVKLGGAETIETISR--GPRRQYKVLPG   | 58  |
| Apex           | MPAGI IAT-VDNGFATIDFVDKSLRGPALAEVEIGGPASIETITRD--GPRRKYRVVPG   | 57  |
| Invubu         | MPEGI IATDHGDGFVTLDFVDKALRGPALAEVEIGGAASIETISR--GPRRQYRVPLG    | 58  |
| Indlovu        | MPEGIVAT-VEDGYATLDFVDPTRLRGAALTKLLDIGGPGTITLTV--GPRRQYRVVPG    | 57  |
| Saguaro        | MPQGI IAT-VDDGFATIDFVDPDLRGPALAEVEIGGPETIETLTV--GPRRQYRVVPG    | 57  |
| Quesadilla     | MPEGI IAT-VDDGFATIDFVDPALRGPALAEVEIGGASSIETITRV--GPRRQYRVVPG   | 57  |
| Anderson       | MPEGI IAT-VEDGFATIDFVNPDRLRGPALAEVEIGGPGTITISR--GPRRKYRVVPG    | 57  |
| AbsoluteMadLad | MPEGI IAT-VEDGFATIDFVNPELRGPALAEVEIGGPGTITISR--GPRRKYRVVPG     | 57  |
| CloverMinnie   | MPEGI IAE-VEDGFATIDFVNPELRGPALAEVEIGGPGTITISR--GPRRKYRVVPG     | 56  |
|                | ** ** . . . . * : : : : : : : * : . : * : * . * : : .          |     |
| Rosebush       | NAREAGLLDDYEVGLSNV-----VASGGTDATG-----I                        | 88  |
| Arbiter        | NAREAGLLDDYEGGLSNV-----VASGGTDATG-----I                        | 88  |
| Hosp           | FAEQANLLDL DENGDP TAPG-----AVFSAGHDTGAAAALVA                   | 92  |
| Thonko         | NAQAAGLLDGDEVA-----VRTAGHDSGAADALVA                            | 88  |
| Phelemich      | NAEAAGLLDGDESGR-----LRTAGPDSGTAAALVA                           | 88  |
| LilMcDreamy    | NADAVGLLDGDEVAR-----PRSAGNDSGARDALVA                           | 88  |
| Athena         | NAREAGLLDEAREVDALVSN-----VLESGVDAH-----                        | 89  |
| TPA2           | NAQAAGLIDGSTPVT-----VKSAGRDSGSAALKA                            | 89  |
| BirdsNest      | NAVELGLVDDAAELAPRGAGAN-----EDGTARGASAGADTGAARTKA               | 102 |
| Apex           | NAQAAGLLDGD-EVG-----DVWSAGRDTGAAAATKA                          | 88  |
| Invubu         | NATEAGLVDDENTVE-----GVR.SAGQDTGRAALKA                          | 90  |
| Indlovu        | NAREAGLLDDATEHPARGSTAFADSDPENDALTSEGGVARGAFTPGSAGTDTGAAAALKA   | 117 |
| Saguaro        | NAREAGLLDDETEGHPRGAV-----QYSAEDAALSEGGVARGAFTPGNAGTDTGAAAALAA  | 113 |
| Quesadilla     | NAREVGLLDEATGEHARGAV-----DHSEEDAALDEGGVARGAFTPGNAGVDTGAAAALKA  | 113 |
| Anderson       | NAEEVGLLDGDEGPAKW-----SAGA--DTGRAALKA                          | 88  |
| AbsoluteMadLad | NAEEVGLLDGDEGPATW-----SAGA--DTGRAALKA                          | 88  |
| CloverMinnie   | NAREVGLLDAASEADDD-----KGQDDKDSGAGDDT--                         | 87  |
|                | * . : * *                                                      |     |
| Rosebush       | VLPEPTSKGL-----VHG---QQLRSGTYRGGDTGNVHTTTPSDPV-----ARG         | 130 |
| Arbiter        | VLPEPTSKGL-----VHG---QQMRSGTYRGGDTGNVHTTTPSDPV-----ARG         | 130 |
| Hosp           | ADPNVN--EGA-DKANWHTPVAEYTSANKYVGVQPN-SQVLD-RVQVHTGDASSYGGSS--  | 145 |
| Thonko         | ADPNVN--AGT-DAEWHPTAEHTSRNAYVGTSA-ADERAMAPSPFTGKGTSYGGGNA      | 144 |
| Phelemich      | ADPNVN--AGA-DNADWHTPYDEYTSANKYVGTTV-TAARAAADPAFTGTATPHGGTNA    | 144 |
| LilMcDreamy    | ADPNVN--PGE-DNANWHQQTTEVGTTRNTYVGTTS-AEERAMTPPRFTGTATPFGGSSA   | 144 |
| Athena         | SAPDLP-----TSANAHST-----TRS--GSYSAAYGGENN                      | 119 |
| TPA2           | AKSTGP-----YFPFTRSNKWSGTGPA-ATADLLGFQALTAQGV-----DL            | 129 |
| BirdsNest      | SDPNVN--KGS-DQADWHTPVAEHTSANAYVGVQPN-AQVLRHGRPQVFTGDADSYGGRSA  | 158 |
| Apex           | SDPNVN--PGA-DNANWHTPVDQYTSANKYVGVQPN-ATVLRHNRGQVYTGADSYGGDL    | 144 |
| Invubu         | ADPNVN--PGA-DNADWHTPVAEHTSANAYVGVQPN-SQVL-DRAQVFTGDAGSYGGSGK   | 145 |
| Indlovu        | ANPNVN--AGA-DGADWHTPVAEHTSANAYVGETTA-AEERAMAPSPFTGLDAPVGGKNA   | 173 |
| Saguaro        | ADPNVN--PGT-DNANWHTPVAEHTSANKYVGETTV-TEARAAADPAYTGTASSYGGKNA   | 169 |
| Quesadilla     | ANPNVN--ATPANAGDWHPTAEYTSANKYVGTSA-AEERALAPSPFTGSATSHGGSSNA    | 170 |
| Anderson       | ADPNVV-----GGDDWHTPILEHSSRNAYVGTVAN--EDVLDRTQVYTGSAHSGFHGAV    | 140 |
| AbsoluteMadLad | ADPNVV-----GGDDWHTPILEHSSRNAYVGTVAN--EDVLDRTQVYTGSAHSGFHGAV    | 140 |
| CloverMinnie   | -----                                                          | 87  |
| Rosebush       | IATPTHAEVIEHVAASGPVQPGVPA-----                                 | 156 |
| Arbiter        | IATPTHAEVIEHVAASGPVQPGVPA-----                                 | 156 |
| Hosp           | GQAPTHREVIEHVKMRGGTL--QAVQ-----TMSFGHPGAEANLSLADQPSAL          | 191 |
| Thonko         | SEVPTRHDVIEHVQARVDNPPVPGT-----AGPAERGAVKANLGLAEQTSAI           | 192 |
| Phelemich      | GDTPTHAEVIAHVKKAHPEGGFVG-----                                  | 168 |
| LilMcDreamy    | ADTPTHAEVIEHVKGHRVTPSQWA-D-----PTDLEHSGAAANLRLASIQSVE          | 191 |
| Athena         | PTPEVPAEALSTVSA-----V-----                                     | 136 |
| TPA2           | PD---STWKLDEMRTFARQEI-----DTGLTTRKAATLERIEDALAA-----           | 170 |
| BirdsNest      | PENETHRELIDRVKEGSSVLAVGGV-----QPATEVEPRALTPVSQINASLKSQTGAL     | 211 |
| Apex           | -HPPTHADI IQHVKDA-----K-----TPPTEGFAAPMARAAVVAGSLAEQDAAL       | 188 |
| Invubu         | --ATTHRDLEHVKANSSVLAVGGV-----QPATEGFAPMAMRAISEGALADQTAAL       | 196 |

|                |                                                              |     |
|----------------|--------------------------------------------------------------|-----|
| Indlovu        | AETQTHREVIDQVTEYKHPANPK-----GHARGAEAQTAVRQAPAQHLNLTALKDQAGAL | 226 |
| Saguaro        | AESESHRQLIDRVKAHELANPK-----GAPRGEAA----PHAPVQSLNTGLVAQTGAL   | 218 |
| Quesadilla     | AETPTHREVIDRVKEFKQANPK-----GAPRGEAA----PHAPVQALNTGLKDRDSAL   | 219 |
| Anderson       | APT--STDLLDGLDAIKYPQPPEEVPPGEGEG----DGEIEGMSAQRVNLGLAEQTSGL  | 194 |
| AbsoluteMadLad | APT--STDLLDGLDAIKYPQPPEEVPPGEGEGDGEDGEGIEGMSAQRVNLGLAEQTSGL  | 198 |
| CloverMinnie   | -----                                                        | 87  |
|                |                                                              |     |
| Rosebush       | --EAYPAPEPGGAYIGMQGLGEA-----VTPAE-AETSGSGD-----              | 190 |
| Arbiter        | --EAYPAPEPGGAYIGMQGLGED-----VTPAE-AETSGSGD-----              | 190 |
| Hosp           | ATDPGSTPDVGGSFVAEDYTSVQ-ATRDLAPLAGPEDVTVIGPDGE-----PENTE     | 240 |
| Thonko         | GTDPQARVVD-----TEAEPVSA-----                                 | 211 |
| Phelemich      | -STPGG-----                                                  | 173 |
| LilMcDreamy    | STDPQGATILPGDKVALA-----TTEEPVDD-----GE-----TDTGA             | 224 |
| Athena         | G-AAQPWD-----EPA-----                                        | 146 |
| TPA2           | --DPEP-----EVVQV---ETPADDTATEAPADTETAE-----                  | 198 |
| BirdsNest      | GDDPGARPDAGGEALGD-YSTPQ-SQRVESPDQGTETLGHVSSVPSGSE-----RVQT   | 264 |
| Apex           | GSDPGGWGPQGEAAPEAPSEPO-----                                  | 211 |
| Invubu         | GSDPGAWGEPGGEALAEDYTSVQ-ATREGESAQGEDQTGDAVITNDPGVSDSPTPTTIVE | 255 |
| Indlovu        | ASDPGGWAEQPDADHPSVGLAPA-A-----EGSE-----DIQT-----             | 258 |
| Saguaro        | ADDPGARPDGEGGARST-YSTVQ-STRQAPRAKEQRKSGT-----A-----          | 257 |
| Quesadilla     | ADDPGARPDGEGGAVRGTTYSTPQ-SQRAEGAQISQEARGGSRAAEVPGAAD-----    | 269 |
| Anderson       | ASDPGATPEVGGEALGEF-TTV-----                                  | 215 |
| AbsoluteMadLad | ASDPGATPEVGGEALGEF-TTV-----                                  | 219 |
| CloverMinnie   | -----                                                        | 87  |
|                |                                                              |     |
| Rosebush       | -----GGVVVDVPGDDDIVAKQAWPAGEPNEDWKRSELDAYAAAS-IGINT          | 234 |
| Arbiter        | -----GGVVVDVPGDDDIVAKQAWPAGEPNEDWKRSELDAYAAAS-IGINT          | 234 |
| Hosp           | NASQPPAEVTEGTQAEPVTEAD--GEFRPDGLPEGEPNADWLRPQLEAYATW-KGIE-   | 295 |
| Thonko         | -----TPRGF---TASEDGAQGEAPTEKWRKIDIDQWAAK-RGIDT               | 249 |
| Phelemich      | -----EPIYPDGAPSLWTRAQLDAYAAA-MTPPI                           | 202 |
| LilMcDreamy    | GASEPL-----PVETTTGD--RGFRPDGLPEGEPNADWLRPQLETYATW-IGLD-      | 270 |
| Athena         | -----VPQELPVAEKAYPEGEPDDEWTRPELNAYATD-HGI--                  | 181 |
| TPA2           | -----                                                        | 198 |
| BirdsNest      | EASPGTTEPS---SEPEPTNEPVSKPDTEDVVEYPEGEPTEKWRRELDAYALKVKGLDT  | 321 |
| Apex           | -----SDETPAAEVT---TPADAPAYPDGEPTVDWTRKQLDAYAADKLDLDT         | 255 |
| Invubu         | GGDPTTGDPTQGGDEPTTLEPT---PAPATQPYPEGPTEDWKRAELDAYALAVKGIDT   | 312 |
| Indlovu        | -----QASAGTAEGITAPDVEDVVEYPQGEPTS DWRRDELDAYALKVKGLDT        | 305 |
| Saguaro        | -----AKSEVIAPPVTA PDTEDVVEYPEGDPSTSWRRDELDAYALKVKGLDT        | 304 |
| Quesadilla     | -----SGSQEAAGGTTPTDTEVVEYPEGEPSPDKWRRELDAYALKVKSLDT          | 316 |
| Anderson       | -----QSTRVEDAAAYPEGEPSEDWKRAELDAYAAA-HGLDT                   | 251 |
| AbsoluteMadLad | -----QSTRVEDAAAYPEGEPSEDWKRAELDAYAAA-HGLDT                   | 255 |
| CloverMinnie   | -----PTDYPDGEPPDSEWKFQDKAYAAD-HEVDI                          | 116 |
|                |                                                              |     |
| Rosebush       | KNL---DNKAAVLDALKK-----                                      | 249 |
| Arbiter        | KNL---DNKAAVLDALKK-----                                      | 249 |
| Hosp           | N-PSGYPNKAEELLTAIENA-----                                    | 313 |
| Thonko         | T-DAGT--KAEALDIIAKAQKG----                                   | 268 |
| Phelemich      | D-TTGLANKQAVLDAIAANQ-----                                    | 221 |
| LilMcDreamy    | N-PSGYPNKTELLTAIENKEQS----                                   | 291 |
| Athena         | EGAANFPNKAALLKAIKDAE-----                                    | 201 |
| TPA2           | -----                                                        | 198 |
| BirdsNest      | TSL---GNKTEVLDAIKNAPKA----                                   | 340 |
| Apex           | TKL---ESKAAVVAAINAPKE-----                                   | 273 |
| Invubu         | TQE---PNKAAVVAAIQNAPTPT---                                   | 332 |
| Indlovu        | SSKSDFPAKKDVLAAINSK-----                                     | 325 |
| Saguaro        | SNRSDFPSKDAVLDAIQQKG-----                                    | 324 |
| Quesadilla     | SGL---GSKAEVLKAIQKKG-----                                    | 333 |
| Anderson       | TKL---ANKGEVLAINEAADGEDDA                                    | 274 |
| AbsoluteMadLad | TKL---ANKGEVLAINEAADGEDDA                                    | 278 |
| CloverMinnie   | DGA---RSKADVLAKIKEQSQ-----                                   | 134 |

**Supporting Figure S5. Multiple sequence alignment of bacteriophage proteins that are related (in the same pham) to Rosebush gp17.** Alignment was done using Clustal Omega. Information of each bacteriophage aligned is as follows. **Rosebush:** B2

subcluster, gp17, accession number AY129334. **Arbiter**: B2 subcluster, gp17, accession number JN618996. **Athena**: B3 subcluster, gp17, accession number JN699003. **Apex**: B4 subcluster, gp14, accession number MN428050. **Phelemich**: B5 subcluster, gp15, accession number KF416341. **Hosp**: B6 subcluster, gp10, accession number KJ433974. **Saguaro**: B7 subcluster, gp16, accession number MH744423. **Thonko**: B8 subcluster, gp15, accession number MH632120. **Quesadilla**: B9 subcluster, gp16, accession number MN617843. **Imvubu**: B10 subcluster, gp11, accession number MN813693. **Indlovu**: B11 subcluster, gp14, no accession number. **LilMcDreamy**: B12 subcluster, gp15, accession number MN284893. **BirdsNest**: B13 subcluster, gp19, accession number MN813686. **TPA2**: Singleton, gp23, accession number HM486077. **Anderson**: UNK subcluster, gp14, no accession number. **CloverMinnie**: DR subcluster, gp15, accession number MN234196.

**Table S1. Mass spectrometry data analysis of band 1 from SDS-PAGE of Rosebush capsid**

| Protein name                                                                              | Protein accession numbers | Total spectrum count | Percentage of total spectra | Percentage sequence coverage |
|-------------------------------------------------------------------------------------------|---------------------------|----------------------|-----------------------------|------------------------------|
| Uncharacterized protein Mycobacterium phage Rosebush Gp=34                                | Q857A0_9CAUD              | 3                    | 0.47%                       | 25.60%                       |
| Uncharacterized protein Mycobacterium phage Rosebush Gp=38                                | Q856Z6_9CAUD              | 10                   | 1.57%                       | 13.30%                       |
| Uncharacterized protein Mycobacterium phage Rosebush Gp=49                                | Q856Y5_9CAUD              | 6                    | 0.94%                       | 13.00%                       |
| WW domain-containing protein Mycobacterium phage Rosebush Gp=32                           | Q857A2_9CAUD              | 9                    | 1.42%                       | 12.10%                       |
| Uncharacterized protein Mycobacterium phage Rosebush Gp=53                                | Q856Y1_9CAUD              | 3                    | 0.47%                       | 9.82%                        |
| Major tail protein Mycobacterium phage Rosebush Gp=21                                     | Q857B3_9CAUD              | 3                    | 0.47%                       | 9.19%                        |
| Uncharacterized protein Mycobacterium phage Rosebush Gp=62                                | Q856X2_9CAUD              | 2                    | 0.31%                       | 7.30%                        |
| Uncharacterized protein Mycobacterium phage Rosebush Gp=15                                | Q857B9_9CAUD              | 3                    | 0.47%                       | 5.93%                        |
| Head-to-tail adaptor Mycobacterium phage Rosebush Gp=24                                   | Q857B0_9CAUD              | 1                    | 0.16%                       | 5.85%                        |
| Uncharacterized protein Mycobacterium phage Rosebush Gp=48                                | Q856Y6_9CAUD              | 1                    | 0.16%                       | 5.59%                        |
| Uncharacterized protein Mycobacterium phage Rosebush Gp=2                                 | Q857D2_9CAUD              | 2                    | 0.31%                       | 4.68%                        |
| Uncharacterized protein Mycobacterium phage Rosebush Gp=37                                | Q856Z7_9CAUD              | 1                    | 0.16%                       | 4.02%                        |
| Uncharacterized protein Mycobacterium phage Rosebush Gp=31                                | Q857A3_9CAUD              | 1                    | 0.16%                       | 3.44%                        |
| Uncharacterized protein Mycobacterium phage Rosebush Gp=45                                | Q856Y9_9CAUD              | 1                    | 0.16%                       | 3.15%                        |
| Tape measure protein Mycobacterium phage Rosebush Gp=29                                   | Q857A5_9CAUD              | 6                    | 0.94%                       | 2.87%                        |
| POLAc domain-containing protein Mycobacterium phage Rosebush Gp=56                        | Q856X8_9CAUD              | 1                    | 0.16%                       | 1.81%                        |
| Capsid maturation protease and MuF-like fusion protein Mycobacterium phage Rosebush Gp=13 | Q857C1_9CAUD              | 2                    | 0.31%                       | 1.47%                        |
| Bovine serum albumin precursor                                                            | CON_P02769                | 426                  | 67.00%                      | 0.00%                        |
| ALB isoform 1 of serum albumin precursor                                                  | CON_P02768-1              | 70                   | 11.00%                      | 0.00%                        |
| KRT1 Keratin, type II cytoskeletal 1                                                      | CON_P04264                | 42                   | 6.60%                       | 0.00%                        |
| KRT10 Keratin, type I cytoskeletal 10                                                     | CON_P13645                | 32                   | 5.03%                       | 0.00%                        |
| Keratin, type II cytoskeletal 2 epidermal                                                 | CON_P35908                | 19                   | 2.99%                       | 0.00%                        |
| Keratin, type I cytoskeletal 9                                                            | CON_P35527                | 15                   | 2.36%                       | 0.00%                        |
| Isoform 1 of Keratin, type I cytoskeletal 10                                              | CON_P02535-1              | 14                   | 2.20%                       | 0.00%                        |
| TRYP_PIG Trypsin (Sus scrofa)                                                             | CON_P00761                | 13                   | 2.04%                       | 0.00%                        |
| KRT14 Keratin, type I cytoskeletal 14                                                     | CON_P02533                | 9                    | 1.42%                       | 0.00%                        |
| KRT16 Keratin, type I cytoskeletal 16                                                     | CON_P08779                | 9                    | 1.42%                       | 0.00%                        |
| HRNR Hornerin                                                                             | CON_Q86YZ3                | 7                    | 1.10%                       | 0.00%                        |
| KRT2 Keratin, type II cytoskeletal 2 epidermal                                            | CON_Q3TTY5                | 6                    | 0.94%                       | 0.00%                        |
| Krt13 Isoform 1 of keratin, type I cytoskeletal 13                                        | CON_P08730-1              | 5                    | 0.79%                       | 0.00%                        |
| Keratin, type II cytoskeletal 6C                                                          | CON_P48668                | 4                    | 0.63%                       | 0.00%                        |



|                                                                     |                                |   |       |       |
|---------------------------------------------------------------------|--------------------------------|---|-------|-------|
| KRT5 Keratin, type II cytoskeletal 5                                | CON_P13647                     | 4 | 0.63% | 0.00% |
| KRT6A Keratin, type II cytoskeletal 6A                              | CON_P02538                     | 4 | 0.63% | 0.00% |
| Keratin, type I cuticular HA2 (Hair keratin, type I HA2)            | CON_Q14532                     | 3 | 0.47% | 0.00% |
| KRT73 Keratin-73                                                    | CON_Q32MB2                     | 3 | 0.47% | 0.00% |
| KRT77 Keratin 77                                                    | CON_Q7Z794                     | 3 | 0.47% | 0.00% |
| CYTOKERATIN homolog                                                 | CON_Q8BGZ7                     | 3 | 0.47% | 0.00% |
| Apolipoprotein E precursor (Bos taurus)                             | CON_Q03247                     | 2 | 0.31% | 0.00% |
| Vitamin D-binding protein precursor (Bos taurus)                    | CON_Q3MHN5                     | 2 | 0.31% | 0.00% |
| Similar to gelsolin (Bos taurus)                                    | CON_Q3SX14                     | 2 | 0.31% | 0.00% |
| Tropomyosin 2 (Bos taurus)                                          | CON_Q3SX28                     | 1 | 0.16% | 0.00% |
| Beta-casein (Bos taurus)                                            | CON_P02666                     | 1 | 0.16% | 0.00% |
| Streptavidin                                                        | CON_Streptavidin               | 1 | 0.16% | 0.00% |
| Similar to collagen alpha 1(III) chain (Bos taurus)                 | CON_P04258                     | 1 | 0.16% | 0.00% |
| Alpha-1-antitrypsin precursor (Bos taurus)                          | CON_P34955                     | 1 | 0.16% | 0.00% |
| Keratin, type I cuticular HA4 (Hair keratin, type I HA4)            | CON_O76011                     | 1 | 0.16% | 0.00% |
| Similar to complement C4-A precursor (Bos taurus)                   | CON_ENSEMBL:ENSBTAP00000007350 | 1 | 0.16% | 0.00% |
| 54 kDa protein (Bos taurus)                                         | CON_ENSEMBL:ENSBTAP00000018229 | 1 | 0.16% | 0.00% |
| Similar to inter-alpha-trypsin inhibitor heavy chain 2 (Bos taurus) | CON_Q9TRI1                     | 1 | 0.16% | 0.00% |

**Table S2. Mass spectrometry data analysis of band 2 from SDS-PAGE of Rosebush capsid**

| Protein name                                               | Protein accession numbers | Total spectrum count | Percentage of total spectra | Percentage sequence coverage |
|------------------------------------------------------------|---------------------------|----------------------|-----------------------------|------------------------------|
| Uncharacterized protein Mycobacterium phage Rosebush Gp=34 | Q857A0_9CAUD              | 5                    | 0.35%                       | 18.60%                       |
| Uncharacterized protein Mycobacterium phage Rosebush Gp=37 | Q856Z7_9CAUD              | 3                    | 0.21%                       | 17.10%                       |
| Uncharacterized protein Mycobacterium phage Rosebush Gp=38 | Q856Z6_9CAUD              | 7                    | 0.50%                       | 14.00%                       |
| Uncharacterized protein Mycobacterium phage Rosebush Gp=40 | Q856Z4_9CAUD              | 1                    | 0.07%                       | 13.20%                       |
| Uncharacterized protein Mycobacterium phage Rosebush Gp=17 | Q857B7_9CAUD              | 2                    | 0.14%                       | 10.00%                       |
| Uncharacterized protein Mycobacterium phage Rosebush Gp=39 | Q856Z5_9CAUD              | 1                    | 0.07%                       | 9.32%                        |
| Uncharacterized protein Mycobacterium phage Rosebush Gp=31 | Q857A3_9CAUD              | 2                    | 0.14%                       | 7.16%                        |
| Uncharacterized protein Mycobacterium phage Rosebush Gp=53 | Q856Y1_9CAUD              | 1                    | 0.07%                       | 6.75%                        |
| Uncharacterized protein Mycobacterium phage Rosebush Gp=45 | Q856Y9_9CAUD              | 1                    | 0.07%                       | 4.72%                        |
| Uncharacterized protein Mycobacterium phage Rosebush Gp=48 | Q856Y6_9CAUD              | 1                    | 0.07%                       | 4.47%                        |
| Major tail protein Mycobacterium phage Rosebush Gp=21      | Q857B3_9CAUD              | 1                    | 0.07%                       | 4.18%                        |
| Tape measure protein Mycobacterium phage Rosebush Gp=29    | Q857A5_9CAUD              | 7                    | 0.50%                       | 4.14%                        |

|                                                                                           |                                |      |        |       |
|-------------------------------------------------------------------------------------------|--------------------------------|------|--------|-------|
| Capsid maturation protease and MuF-like fusion protein Mycobacterium phage Rosebush Gp=13 | Q857C1_9CAUD                   | 3    | 0.21%  | 3.68% |
| Bovine serum albumin precursor                                                            | CON_P02769                     | 1069 | 75.50% | 0.00% |
| ALB isoform 1 of serum albumin precursor                                                  | CON_P02768-1                   | 110  | 7.77%  | 0.00% |
| KRT10 Keratin, type I cytoskeletal 10                                                     | CON_P13645                     | 80   | 5.65%  | 0.00% |
| KRT1 Keratin, type II cytoskeletal 1                                                      | CON_P04264                     | 54   | 3.82%  | 0.00% |
| KRT2 Keratin, type II cytoskeletal 2 epidermal                                            | CON_P35908                     | 36   | 2.54%  | 0.00% |
| TRYP_PIG Trypsin ( <i>Sus scrofa</i> )                                                    | CON_P00761                     | 34   | 2.40%  | 0.00% |
| KRT5 Keratin, type II cytoskeletal 5                                                      | CON_P13647                     | 25   | 1.77%  | 0.00% |
| KRT14 Keratin, type I cytoskeletal 14                                                     | CON_P02533                     | 20   | 1.41%  | 0.00% |
| Krt10 isoform 1 of keratin, type I cytoskeletal 10                                        | CON_P02535-1                   | 19   | 1.34%  | 0.00% |
| KRT16 Keratin, type I cytoskeletal 16                                                     | CON_P08779                     | 17   | 1.20%  | 0.00% |
| KRT6A Keratin, type II cytoskeletal 6A                                                    | CON_P02538                     | 15   | 1.06%  | 0.00% |
| KRT9 Keratin, type I cytoskeletal 9                                                       | CON_P35527                     | 14   | 0.99%  | 0.00% |
| KRT6C Keratin, type II cytoskeletal 6C                                                    | CON_P48668                     | 14   | 0.99%  | 0.00% |
| KRT3 Keratin, type II cytoskeletal 3                                                      | CON_P12035                     | 11   | 0.78%  | 0.00% |
| 54 kDa protein ( <i>Bos taurus</i> )                                                      | CON_ENSEMBL:ENSBTAP00000018229 | 11   | 0.78%  | 0.00% |
| 63 kDa protein ( <i>Bos taurus</i> )                                                      | CON_ENSEMBL:ENSBTAP00000038253 | 11   | 0.78%  | 0.00% |
| Vitamin D-binding protein precursor ( <i>Bos taurus</i> )                                 | CON_Q3MHN5                     | 11   | 0.78%  | 0.00% |
| Krt13 Isoform 1 of keratin, type I cytoskeletal 13                                        | CON_P08730-1                   | 10   | 0.71%  | 0.00% |
| SERPINA3-4 ( <i>Bos taurus</i> )                                                          | CON_A2I7N0                     | 8    | 0.57%  | 0.00% |
| KRT2 Keratin, type II cytoskeletal 2 epidermal                                            | CON_Q3TTY5                     | 7    | 0.50%  | 0.00% |
| Similar to endopin 2B ( <i>Bos taurus</i> )                                               | CON_REFSEQ:XP_001252647        | 6    | 0.42%  | 0.00% |
| KRT77 Keratin 77                                                                          | CON_Q7Z794                     | 6    | 0.42%  | 0.00% |
| Keratin, type I cuticular HA2 (Hair keratin, type I HA2)                                  | CON_Q14532                     | 5    | 0.35%  | 0.00% |
| KRT73 Keratin-73                                                                          | CON_Q6NXH9                     | 5    | 0.35%  | 0.00% |
| HRNR Homerin                                                                              | CON_Q86YZ3                     | 3    | 0.21%  | 0.00% |
| FLG2 Filaggrin-2                                                                          | CON_Q5D862                     | 3    | 0.21%  | 0.00% |
| Alpha-1-antiproteinase precursor ( <i>Bos taurus</i> )                                    | CON_P34955                     | 3    | 0.21%  | 0.00% |
| Tropomyosin 2 ( <i>Bos taurus</i> )                                                       | CON_Q3SX28                     | 2    | 0.14%  | 0.00% |
| Alpha-1-acid glycoprotein precursor ( <i>Bos taurus</i> )                                 | CON_Q3SZR3                     | 2    | 0.14%  | 0.00% |
| Beta-casein ( <i>Bos taurus</i> )                                                         | CON_P02666                     | 2    | 0.14%  | 0.00% |
| 9 kDa protein ( <i>Bos taurus</i> )                                                       | CON_ENSEMBL:ENSBTAP00000038329 | 2    | 0.14%  | 0.00% |
| Similar to inter-alpha-trypsin inhibitor heavy chain 2 ( <i>Bos taurus</i> )              | CON_Q9TRI1                     | 1    | 0.07%  | 0.00% |
| LUXY_VIBFI Yellow fluorescent protein (YFP) <i>Vibrio fischeri</i>                        | CON_P21578                     | 1    | 0.07%  | 0.00% |
| Amylase, alpha 2B; pancreatic ( <i>Bos taurus</i> )                                       | CON_Q3MHH8                     | 1    | 0.07%  | 0.00% |

**Table S3. Mass spectrometry data analysis of band 3 from SDS-PAGE of Rosebush capsid**

| Protein name                                                                              | Protein accession numbers      | Total spectrum count | Percentage of total spectra | Percentage sequence coverage |
|-------------------------------------------------------------------------------------------|--------------------------------|----------------------|-----------------------------|------------------------------|
| Uncharacterized protein Mycobacterium phage Rosebush Gp=34                                | Q857A0_9CAUD                   | 4                    | 0.70%                       | 31.00%                       |
| Uncharacterized protein Mycobacterium phage Rosebush Gp=17                                | Q857B7_9CAUD                   | 11                   | 1.93%                       | 23.30%                       |
| Uncharacterized protein Mycobacterium phage Rosebush Gp=42                                | Q856Z2_9CAUD                   | 2                    | 0.35%                       | 13.90%                       |
| Capsid maturation protease and MuF-like fusion protein Mycobacterium phage Rosebush Gp=13 | Q857C1_9CAUD                   | 17                   | 2.98%                       | 11.40%                       |
| Uncharacterized protein Mycobacterium phage Rosebush Gp=37                                | Q856Z7_9CAUD                   | 2                    | 0.35%                       | 8.54%                        |
| Major tail protein Mycobacterium phage Rosebush Gp=21                                     | Q857B3_9CAUD                   | 3                    | 0.53%                       | 7.80%                        |
| Uncharacterized protein Mycobacterium phage Rosebush Gp=4                                 | Q857D0_9CAUD                   | 1                    | 0.18%                       | 6.99%                        |
| Uncharacterized protein Mycobacterium phage Rosebush Gp=31                                | Q857A3_9CAUD                   | 2                    | 0.35%                       | 5.44%                        |
| Uncharacterized protein Mycobacterium phage Rosebush Gp=49                                | Q856Y5_9CAUD                   | 2                    | 0.35%                       | 4.40%                        |
| Uncharacterized protein Mycobacterium phage Rosebush Gp=62                                | Q856X2_9CAUD                   | 1                    | 0.18%                       | 3.43%                        |
| Uncharacterized protein Mycobacterium phage Rosebush Gp=45                                | Q856Y9_9CAUD                   | 1                    | 0.18%                       | 3.15%                        |
| Uncharacterized protein Mycobacterium phage Rosebush Gp=38                                | Q856Z6_9CAUD                   | 1                    | 0.18%                       | 2.75%                        |
| Bovine serum albumin precursor                                                            | CON_P02769                     | 297                  | 52.10%                      | 0.00%                        |
| KRT1 Keratin, type II cytoskeletal 1                                                      | CON_P04264                     | 57                   | 10.00%                      | 0.00%                        |
| TRYP_PIG Trypsin (Sus scrofa)                                                             | CON_P00761                     | 37                   | 6.49%                       | 0.00%                        |
| ALB isoform 1 of serum albumin precursor                                                  | CON_P02768-1                   | 35                   | 6.14%                       | 0.00%                        |
| KRT10 Keratin, type I cytoskeletal 10                                                     | CON_P13645                     | 27                   | 4.74%                       | 0.00%                        |
| KRT9 Keratin, type I cytoskeletal 9                                                       | CON_P35527                     | 24                   | 4.21%                       | 0.00%                        |
| KRT2 Keratin, type II cytoskeletal 2 epidermal                                            | CON_P35908                     | 11                   | 1.93%                       | 0.00%                        |
| Vitamin D-binding protein precursor (Bos taurus)                                          | CON_Q3MHN5                     | 9                    | 1.58%                       | 0.00%                        |
| 54 kDa protein (Bos taurus)                                                               | CON_ENSEMBL:ENSBTAP00000018229 | 9                    | 1.58%                       | 0.00%                        |
| Krt10 isoform 1 of keratin, type I cytoskeletal 10                                        | CON_P02535-1                   | 8                    | 1.40%                       | 0.00%                        |
| SERPINA3-5 (Bos taurus)                                                                   | CON_A2I7N1                     | 7                    | 1.23%                       | 0.00%                        |
| KRT5 Keratin, type II cytoskeletal 5                                                      | CON_P13647                     | 6                    | 1.05%                       | 0.00%                        |
| HRNR Hornerin                                                                             | CON_Q86YZ3                     | 6                    | 1.05%                       | 0.00%                        |
| SERPINA3-4 (Bos taurus)                                                                   | CON_A2I7N0                     | 5                    | 0.88%                       | 0.00%                        |
| Similar to endopin 2B (Bos taurus)                                                        | CON_REFSEQ:XP_001252647        | 5                    | 0.88%                       | 0.00%                        |
| KRT14 Keratin, type I cytoskeletal 14                                                     | CON_P02533                     | 5                    | 0.88%                       | 0.00%                        |
| PRSS1 Trypsin-1 precursor                                                                 | CON_P07477                     | 5                    | 0.88%                       | 0.00%                        |
| Krt13 isoform 1 of keratin, type I cytoskeletal 13                                        | CON_P08730-1                   | 5                    | 0.88%                       | 0.00%                        |
| Alpha-1-acid glycoprotein precursor (Bos taurus)                                          | CON_Q3SZR3                     | 4                    | 0.70%                       | 0.00%                        |

|                                                            |                                                |   |       |       |
|------------------------------------------------------------|------------------------------------------------|---|-------|-------|
| Keratin, type I cuticular HA2                              | CON_Q14532                                     | 4 | 0.70% | 0.00% |
| KRT16 Keratin, type I cytoskeletal 16                      | CON_P08779                                     | 4 | 0.70% | 0.00% |
| Krt35 protein                                              | CON_Q49714                                     | 3 | 0.53% | 0.00% |
| Similar to sex hormone-binding globulin (Bos taurus)       | CON_Q6T181                                     | 3 | 0.53% | 0.00% |
| KRT6A Keratin, type II cytoskeletal 6A                     | CON_P02538                                     | 3 | 0.53% | 0.00% |
| KRT6C Keratin, type II cytoskeletal 6C                     | CON_P48668                                     | 2 | 0.35% | 0.00% |
| Beta-casein (Bos taurus)                                   | CON_P02666                                     | 2 | 0.35% | 0.00% |
| Similar to carboxypeptidase N catalytic chain (Bos taurus) | CON_Q2KJ83                                     | 2 | 0.35% | 0.00% |
| Coagulation factor V precursor (Bos taurus)                | CON_Q28107                                     | 2 | 0.35% | 0.00% |
| Similar to intersectin long isoform 4 (Bos taurus)         | CON_ENSEMBL:ENSBTAP00000001528                 | 2 | 0.35% | 0.00% |
| 9 kDa protein (Bos taurus)                                 | CON_ENSEMBL:ENSBTAP00000038329                 | 1 | 0.18% | 0.00% |
| Tropomyosin 2 (Bos taurus)                                 | CON_Q3SX28                                     | 1 | 0.18% | 0.00% |
| 44 kDa protein (Bos taurus)                                | CON_ENSEMBL:ENSBTAP00000024466                 | 1 | 0.18% | 0.00% |
| Alpha-1-antiproteinase precursor (Bos taurus)              | CON_P34955                                     | 1 | 0.18% | 0.00% |
| Keratin, type II cuticular Hb6                             | CON_O43790, CON_P78385, CON_Q14533, CON_Q6NT21 | 1 | 0.18% | 0.00% |
| KRT73 Keratin-73                                           | CON_Q32MB2                                     | 1 | 0.18% | 0.00% |
| Apolipoprotein A-IV precursor (Bos taurus)                 | CON_Q32PJ2                                     | 1 | 0.18% | 0.00% |
| Type I hair keratin KA35 (Homo sapiens)                    | CON_Q6IFU6                                     | 1 | 0.18% | 0.00% |

**Table S4. Mass spectrometry data analysis of band 4 from SDS-PAGE of Rosebush capsid**

| Protein name                                               | Protein accession numbers | Total spectrum count | Percentage of total spectra | Percentage sequence coverage |
|------------------------------------------------------------|---------------------------|----------------------|-----------------------------|------------------------------|
| Uncharacterized protein Mycobacterium phage Rosebush Gp=17 | Q857B7_9CAUD              | 101                  | 21.80%                      | 54.20%                       |
| Major tail protein Mycobacterium phage Rosebush Gp=21      | Q857B3_9CAUD              | 7                    | 1.51%                       | 18.90%                       |
| Uncharacterized protein Mycobacterium phage Rosebush Gp=34 | Q857A0_9CAUD              | 2                    | 0.43%                       | 17.10%                       |
| Uncharacterized protein Mycobacterium phage Rosebush Gp=37 | Q856Z7_9CAUD              | 3                    | 0.65%                       | 15.10%                       |
| Uncharacterized protein Mycobacterium phage Rosebush Gp=53 | Q856Y1_9CAUD              | 4                    | 0.86%                       | 14.70%                       |
| Uncharacterized protein Mycobacterium phage Rosebush Gp=5  | Q857C9_9CAUD              | 1                    | 0.22%                       | 13.90%                       |
| Uncharacterized protein Mycobacterium phage Rosebush Gp=40 | Q856Z4_9CAUD              | 1                    | 0.22%                       | 13.20%                       |
| Uncharacterized protein Mycobacterium phage Rosebush Gp=4  | Q857D0_9CAUD              | 1                    | 0.22%                       | 6.99%                        |
| Uncharacterized protein Mycobacterium phage Rosebush Gp=58 | Q856X6_9CAUD              | 1                    | 0.22%                       | 4.94%                        |
| Uncharacterized protein Mycobacterium phage Rosebush Gp=62 | Q856X2_9CAUD              | 1                    | 0.22%                       | 3.43%                        |
| Uncharacterized protein Mycobacterium phage Rosebush Gp=45 | Q856Y9_9CAUD              | 1                    | 0.22%                       | 3.15%                        |
| Uncharacterized protein Mycobacterium phage Rosebush Gp=42 | Q856Z2_9CAUD              | 1                    | 0.22%                       | 2.60%                        |

|                                                                     |                                                    |     |        |       |
|---------------------------------------------------------------------|----------------------------------------------------|-----|--------|-------|
| Uncharacterized protein Mycobacterium phage Rosebush Gp=49          | Q856Y5_9CAUD                                       | 1   | 0.22%  | 2.20% |
| Uncharacterized protein Mycobacterium phage Rosebush Gp=15          | Q857B9_9CAUD                                       | 1   | 0.22%  | 1.78% |
| Bovine serum albumin precursor                                      | CON__P02769                                        | 143 | 30.90% | 0.00% |
| TRYP_PIG Trypsin (Sus scrofa)                                       | CON__P00761                                        | 53  | 11.40% | 0.00% |
| KRT1 Keratin, type II cytoskeletal 1                                | CON__P04264                                        | 33  | 7.13%  | 0.00% |
| Alpha-1-acid glycoprotein precursor (Bos taurus)                    | CON__Q35ZR3                                        | 22  | 4.75%  | 0.00% |
| KRT10 Keratin, type I cytoskeletal 10                               | CON__P13645                                        | 19  | 4.10%  | 0.00% |
| ALB isoform 1 of serum albumin precursor                            | CON__P02768-1                                      | 17  | 3.67%  | 0.00% |
| KRT6C Keratin, type II cytoskeletal 6C                              | CON__P48668                                        | 14  | 3.02%  | 0.00% |
| KRT6A Keratin, type II cytoskeletal 6A                              | CON__P02538                                        | 13  | 2.81%  | 0.00% |
| KRT2 Keratin, type II cytoskeletal 2 epidermal                      | CON__P35908                                        | 11  | 2.38%  | 0.00% |
| KRT5 Keratin, type II cytoskeletal 5                                | CON__P13647                                        | 10  | 2.16%  | 0.00% |
| KRT9 Keratin, type I cytoskeletal 9                                 | CON__P35527                                        | 9   | 1.94%  | 0.00% |
| KRT14 Keratin, type I cytoskeletal 14                               | CON__P02533                                        | 6   | 1.30%  | 0.00% |
| HRNR Hornerin                                                       | CON__Q86Y23                                        | 5   | 1.08%  | 0.00% |
| Krt10 isoform 1 of keratin, type I cytoskeletal 10                  | CON__P02535-1                                      | 5   | 1.08%  | 0.00% |
| PRSS1 Trypsin-1 precursor                                           | CON__P07477                                        | 4   | 0.86%  | 0.00% |
| FLG Filaggrin                                                       | CON__P20930                                        | 4   | 0.86%  | 0.00% |
| Coagulation factor V precursor (Bos taurus)                         | CON__Q28107                                        | 4   | 0.86%  | 0.00% |
| KRT23 Keratin, type I cytoskeletal 23                               | CON__Q9C075                                        | 3   | 0.65%  | 0.00% |
| Keratin, type II cuticular Hb6                                      | CON__Q43790, CON__P78385, CON__Q14533, CON__Q6NT21 | 3   | 0.65%  | 0.00% |
| KRT73 Keratin-73                                                    | CON__Q32MB2                                        | 3   | 0.65%  | 0.00% |
| KRT77 Keratin 77                                                    | CON__Q7Z794                                        | 3   | 0.65%  | 0.00% |
| Krt31 keratin complex 1, acidic, gene 1                             | CON__A2A5Y0                                        | 1   | 0.22%  | 0.00% |
| Similar to complement factor I (Bos taurus)                         | CON__Q32PI4                                        | 1   | 0.22%  | 0.00% |
| Fibrinogen alpha chain precursor (Bos taurus)                       | CON__P02672                                        | 1   | 0.22%  | 0.00% |
| IGHM protein (Bos taurus)                                           | CON__Q1RMK2                                        | 1   | 0.22%  | 0.00% |
| Similar to alpha-2-macroglobulin isoform 1 (Bos taurus)             | CON__ENSEMBL:ENSBTAP00000024146                    | 1   | 0.22%  | 0.00% |
| Keratin, type I cuticular HA2                                       | CON__Q14532                                        | 1   | 0.22%  | 0.00% |
| Similar to inter-alpha-trypsin inhibitor heavy chain 2 (Bos taurus) | CON__Q9TRI1                                        | 1   | 0.22%  | 0.00% |
| SERPINA3-5 (Bos taurus)                                             | CON__A2I7N1                                        | 1   | 0.22%  | 0.00% |
| Beta-casein (Bos taurus)                                            | CON__P02666                                        | 1   | 0.22%  | 0.00% |
| Similar to endopin 2B (Bos taurus)                                  | CON__REFSEQ:XP_001252647                           | 1   | 0.22%  | 0.00% |
